# Supplementary material for: Invasion dynamics of antimicrobial-resistant E. coli in river biofilms: impacts on the resistome, microbiomes, and horizontal gene transfer
Source: Research Square preprint supplement (doi:10.21203/rs.3.rs-8270852/v1), 2025-12-09
Supplement: Supplementary file 2 [file 773bc609c4f068844e814da3.xlsx]

## Sheet: TableS1
Table S1. qPCR primers and probes for each analyzed target gene
Target Gene	Assay	Primer	Sequences (5' to 3')	Product size (bp)	Annealing temp. (°C)*	References
16S rRNA	TaqMan	BAC349-F	AGGCAGCAGTDRGGAAT	457	53	(Takai and Horikoshi, 2000)
		BAC806-R	GGACTACYVGGGTATCTAAT
		BAC516F-Probe	FAM-TGCCAGCAGCCGCGGTAATACRDAG-BHQ1
ΔlacZY	TaqMan	EDCM-F	GACAGGTTTCCCGACTGG	83	60	(Merlin et al., 2002)
		EDCM-R	CGACTTCATTCACCTGACGA
		EDCM-Probe	FAM-CCGCTTGGAACGGGCTCACT-TAMRA
pG527	TaqMan	pG527-1b	ATGCAAGAACGGAAATGGAC	94	60	(Merlin et al., 2002)
		pG527-2b/1c	TTCCGTTCAGGACGCTACTT
		pG527-Pb	TCATTTGCCTTTATTAAGTCGAGC
*Values modified from the originals and optimized in a laboratory setting

## Sheet: TableS2
Table S2. Information on quantitative PCR validation
qPCR primer	Specificity* Verification Method	Slope	qPCR- efficiency	R2	Y-intercept	Linear dynamic range (copies - copies)	LOD-copies (Cq)	S.D. at LOD (min - max)	Cq of the H2O control	Cq of the NTC
∆lacZY	H	-3.36	98.4	1	41.2	50 - 50.000.000	50	0.32 - 0.05	N.D.	N.D.
pG527	H	-3.42	96.3	1	45	50 - 50.000.000	50	0.25-0.09	N.D.	N.D.
16S rRNA	H	-3.47	94.2	1	40.5	50 - 50.000.000	50	0.19 - 0.06	N.D.	N.D.
Note: Cq - quantification cycle; LOD - limit of detection; S.D - standard deviation; NTC - non-template control; N.D. - Not-detected; H - Hydrolysis probe (TaqMan)
